# Supplementary material for: Quantitative analysis of radium-226 at the microscale by NanoSIMS
Source: Royal Society of Chemistry journal article supplement (doi:10.1039/d5ja00337g), 2026-01-01
Supplement: d5ja00337g1.pdf [file d5ja00337g1.pdf]

## Supporting information:

### Quantitative analysis of radium-226 at the microscale by NanoSIMS

Louise Darricau<sup>a</sup>, Jérôme Aléon<sup>b</sup>, Maximilien Verdier<sup>b</sup>, Virginie Sellier<sup>a</sup>, Josselin Gorny<sup>a</sup>, Smail Mostefaoui<sup>b</sup>, Cyrielle Jardin<sup>a</sup>, Arnaud Mangeret<sup>a</sup>, Arnaud Duverger<sup>b</sup>, Nicolas Ait-Ouabbas<sup>a</sup>, David Suhard<sup>a</sup>, Gilles Montavon<sup>c</sup>, Alkiviadis Gourgiotis<sup>a</sup>

- a- Autorité de sûreté nucléaire et de radioprotection (ASNR), PSE-ENV/SPDR/LT2S, PSE-SANTE/SESANE/LRSI, Fontenay-aux-Roses, F-92260, France
- b- Institut de Minéralogie, de Physique des Matériaux et de Cosmochimie, Sorbonne Université, Museum National d'Histoire Naturelle, CNRS UMR7590, 61 rue Buffon, 75005 Paris, France
- c- Laboratoire SUBATECH, UMR 6457, IMT Atlantique/Université de Nantes/CNRS/IN2P3, 4, rue Alfred Kastler, Nantes, 44307, France

Corresponding author: Alkiviadis Gourgiotis ([alkiviadis.gourgiotis@irsn.fr](mailto:alkiviadis.gourgiotis@irsn.fr)), Jérôme Aléon ([jerome.aleon@mnhn.fr](mailto:jerome.aleon@mnhn.fr))

## Material and methods

### $^{226}\text{Ra}$ reference material A

The  $^{226}\text{Ra}$  solution for reference material A was first prepared with 1.3 g of uraninite dissolved in 20 mL of 3 mol.L<sup>-1</sup> HNO<sub>3</sub> at 90°C. 2 mL of 3 mol.L<sup>-1</sup> HNO<sub>3</sub> at 90°C were added and resulted in the observation of a gray precipitate at the bottom of the tube and a yellow-green supernatant of approximately 15 mL. The supernatant solution of 15 mL was then successively passed 4 times through a 20 mL UTEVA column. At the end of each passage, a 50 µL aliquot of the solution was taken for ICP-MS analyses. Parallel ICP-MS analyses validate the complete extraction of  $^{238}\text{U}$  and  $^{232}\text{Th}$ . The analysis of the first two solutions after passing through the column confirmed the absence of  $^{238}\text{U}$  and  $^{232}\text{Th}$ . These two solutions were combined and then dried in a Savillex vessel at 140°C. 7.5 mL of 2 mol.L<sup>-1</sup> HCl was used to dissolve the residue obtained after heating. At the end of this step, a white precipitate and a green supernatant solution were obtained. The supernatant was then poured into an AG1-X8 column to extract Pb and bismuth from the solution.

A microprecipitation process was then used to create the Ra-barite reference material. The resulting solution was mixed with 1 mL of 0.1 mol.L<sup>-1</sup> Na<sub>2</sub>SO<sub>4</sub> solution and 1 mL of 0.1 mol.L<sup>-1</sup> Ba(NO<sub>3</sub>)<sub>2</sub> solution. The precipitation of a white solid was instantaneous.

50 µL of supernatant was taken after centrifugation at 3500 rpm during 15 min for ICP-MS analyses to access the amount of  $^{226}\text{Ra}$  precipitated as barite.

The precipitated was dried at 75°C during several hours until mass stabilization.

### $^{226}\text{Ra}$ reference material B

This reference material was created from an initial 2 mL  $^{226}\text{Ra}$  solution of 8.8 kBq with 200 µL of a  $^{232}\text{Th}$  solution of 0.001 mg.L<sup>-1</sup>. To this mixture was added 1 mL of 0.1 mol.L<sup>-1</sup> Na<sub>2</sub>SO<sub>4</sub> solution and 1 mL of 0.1 mol.L<sup>-1</sup> Ba(NO<sub>3</sub>)<sub>2</sub> solution. Precipitation and validation process were the same as the precedent reference material.

## Barite reference materials dopped with Pb

To study the effect of the  $^{208}\text{Pb}^{18}\text{O}$  interference, three barite dopped with the following amount of Pb:  $100\text{ }\mu\text{g.g}^{-1}$ ,  $1000\text{ }\mu\text{g.g}^{-1}$  and  $10000\text{ }\mu\text{g.g}^{-1}$ , were synthetized with the same protocol previously presented using a Pb solution of  $981\text{ mg.L}^{-1}$  instead of the  $^{226}\text{Ra}$  and  $^{232}\text{Th}$  solutions. Precipitation and validation process were the same as precedent reference materials.

## Blank

The processus was also realized without any Ra elemental solution to obtain a blank. Precipitate from this process was conserved to ensure that the  $^{226}\text{Ra}$  count detected by NanoSIMS is not influenced by other elements present in the barite.

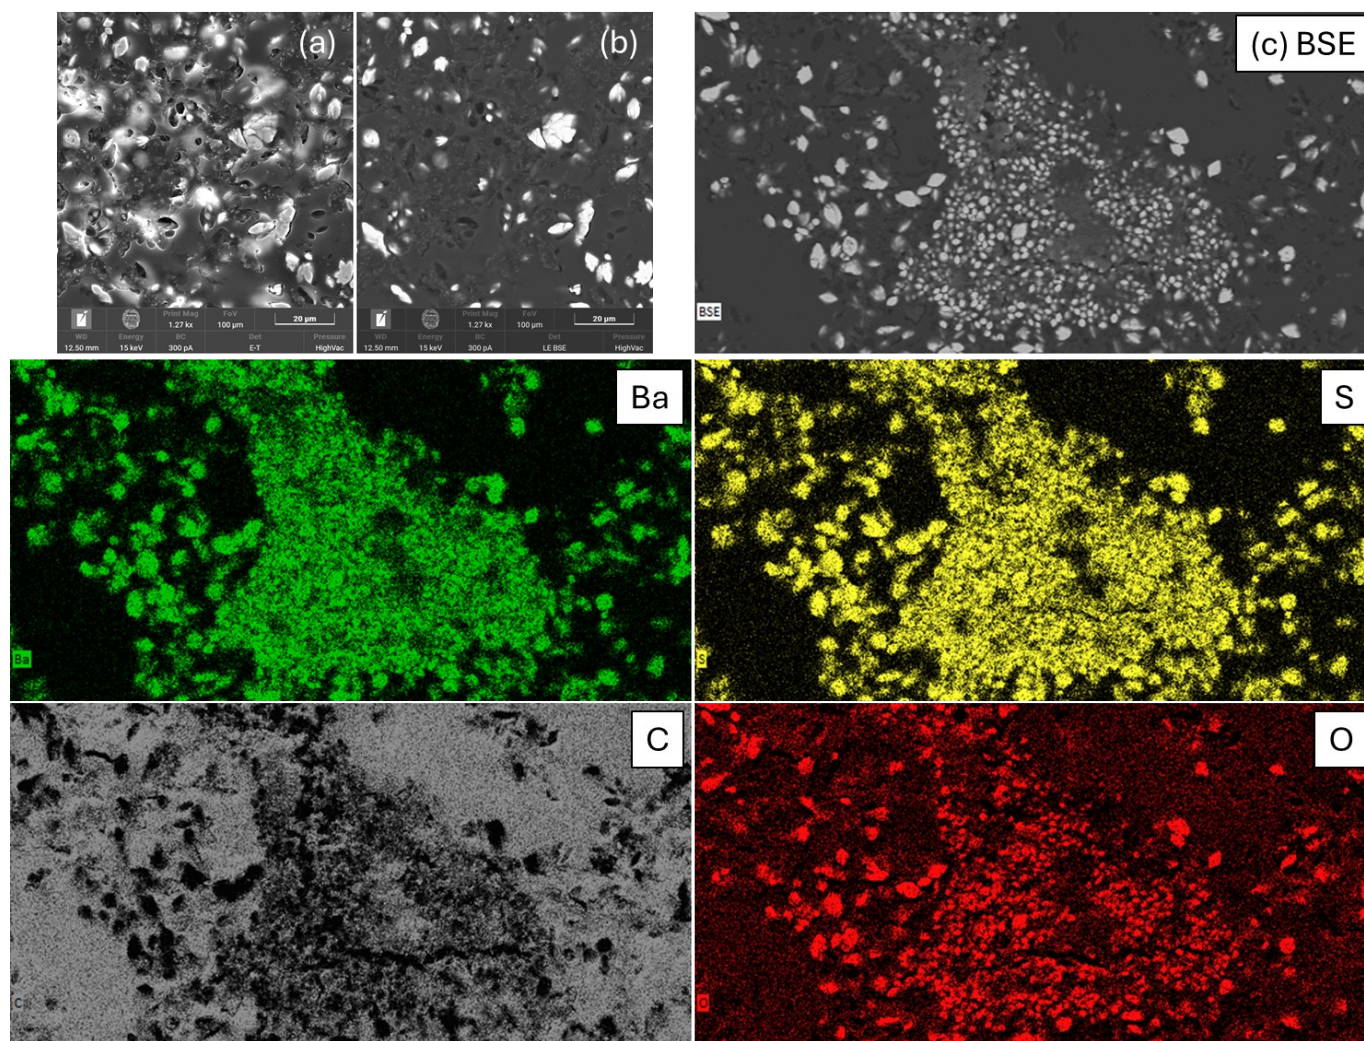

Figure SI-1: SEM images of blank synthesized material with (a) and (c) secondary electrons (SE) and (b) backscattered electrons (BSE) images of barite grains and elemental maps obtained with EDX analyzes of Ba, S, C and O.

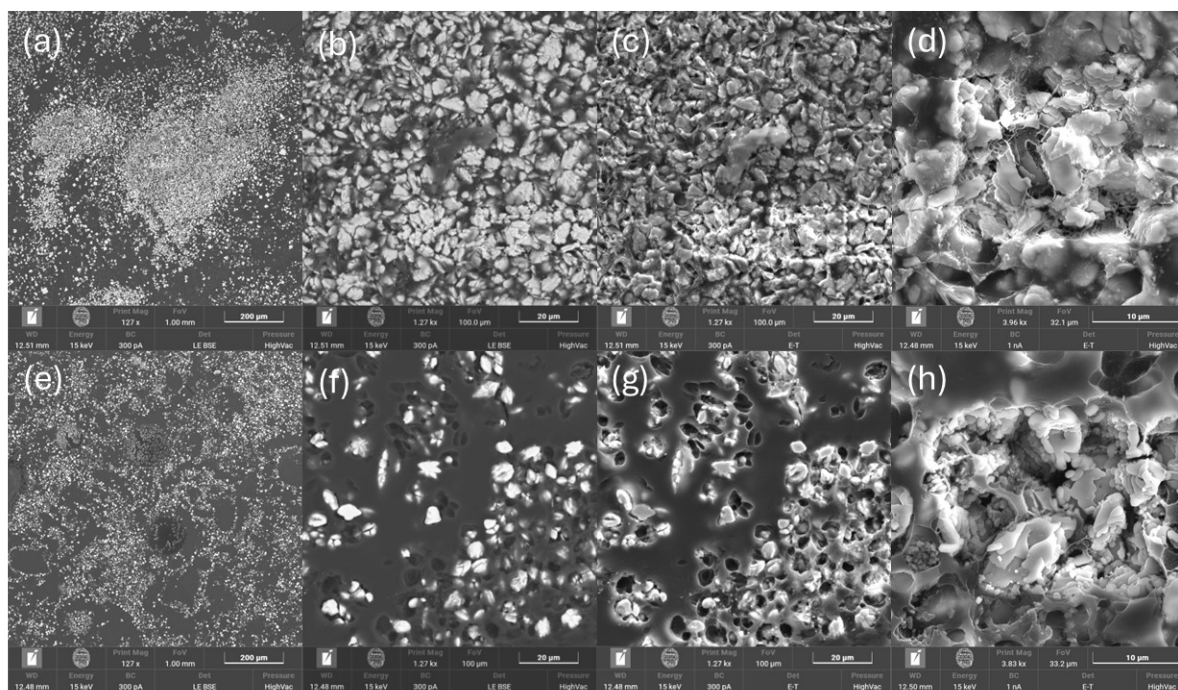

|                                                                          | at%  | O     | S     | Cl   | Ba     | Ba/S |       |
|--------------------------------------------------------------------------|------|-------|-------|------|--------|------|-------|
| Blank                                                                    | 2    | 66.63 | 15.14 | 0.36 | 17.86  | 1.18 |       |
|                                                                          | 1    | 68.18 | 14.23 | 0.34 | 17.25  | 1.21 |       |
|                                                                          | 4    | 65.57 | 14.51 | 0    | 19.82  | 1.37 |       |
|                                                                          | 5    | 66.9  | 16.06 | 0    | 17.04  | 1.06 |       |
|                                                                          | 6    | 67.17 | 15.23 | 0.24 | 17.36  | 1.14 |       |
|                                                                          | 7    | 67.48 | 14.53 | 0.1  | 17.89  | 1.23 |       |
|                                                                          | 8    | 63.84 | 16.7  | 0.36 | 19.1   | 1.14 | stdev |
|                                                                          | avge | 66.54 | 15.2  | 0.2  | 18.05  | 1.19 | 0.1   |
| Reference material A<br>– $^{226}\text{Ra}$<br>$2.89 \mu\text{g.g}^{-1}$ | nano | 58.96 | 13.59 | 7.82 | 19.37  |      |       |
|                                                                          | 3    | 64.98 | 16.89 | 2.42 | 15.72  | 0.93 |       |
|                                                                          | 4    | 63.77 | 17.61 | 0.84 | 17.79  | 1.01 |       |
|                                                                          | 5    | 65.56 | 15.23 | 0.99 | 18.21  | 1.2  |       |
|                                                                          | 6    | 67.49 | 14.11 | 1.53 | 16.87  | 1.2  |       |
|                                                                          | 7    | 64.13 | 16.58 | 1.19 | 18.1   | 1.09 |       |
|                                                                          | 8    | 64.07 | 16.24 | 0.94 | 18.74  | 1.15 |       |
|                                                                          | 9    | 64.16 | 16.78 | 0.59 | 18.46  | 1.1  | stdev |
|                                                                          | avge | 64.88 | 16.21 | 1.21 | 17.7   | 1.19 | 0.1   |
| Reference material B<br>– $^{226}\text{Ra}$<br>$9.65 \mu\text{g.g}^{-1}$ | nano | 59.78 | 14.46 | 4.37 | 21.39  |      |       |
|                                                                          | 2    | 63.34 | 17    | 0.45 | 19.21  | 1.13 |       |
|                                                                          | 1    | 66.34 | 15.52 | 0.54 | 17.6   | 1.13 |       |
|                                                                          | 4    | 64.76 | 15.86 | 0.44 | 18.94  | 1.19 |       |
|                                                                          | 5    | 66    | 15.46 | 0.32 | 18.022 | 1.18 |       |
|                                                                          | 6    | 66.23 | 15.4  | 0.18 | 18.19  | 1.18 |       |
|                                                                          | 7    | 66.05 | 15.47 | 0.41 | 18.07  | 1.17 |       |
|                                                                          | 8    | 66.24 | 15.78 | 0.44 | 17.55  | 1.11 |       |
|                                                                          | 9    | 66.7  | 15.01 | 0.3  | 17.98  | 1.2  | stdev |
|                                                                          | avge | 65.05 | 15.55 | 0.83 | 18.57  | 1.16 | 0.03  |

Figure SI-2: SEM (a), (c) et (d) SE and (b) BSE images of reference material A with  $2.89 \mu\text{g.g}^{-1}$  of  $^{226}\text{Ra}$  and SEM (e), (g) and (h) SE and (f) BSE images of reference material B with  $9.65 \mu\text{g.g}^{-1}$  of  $^{226}\text{Ra}$ , with table results of O, S, Cl and Ba (at%) beside obtain from some area analyzed of the blank and reference material A and B. SE images (d) and (h) show area analyzed by NanoSIMS.



Reference material A - barite with  $2.89 \mu\text{g.g}^{-1}$

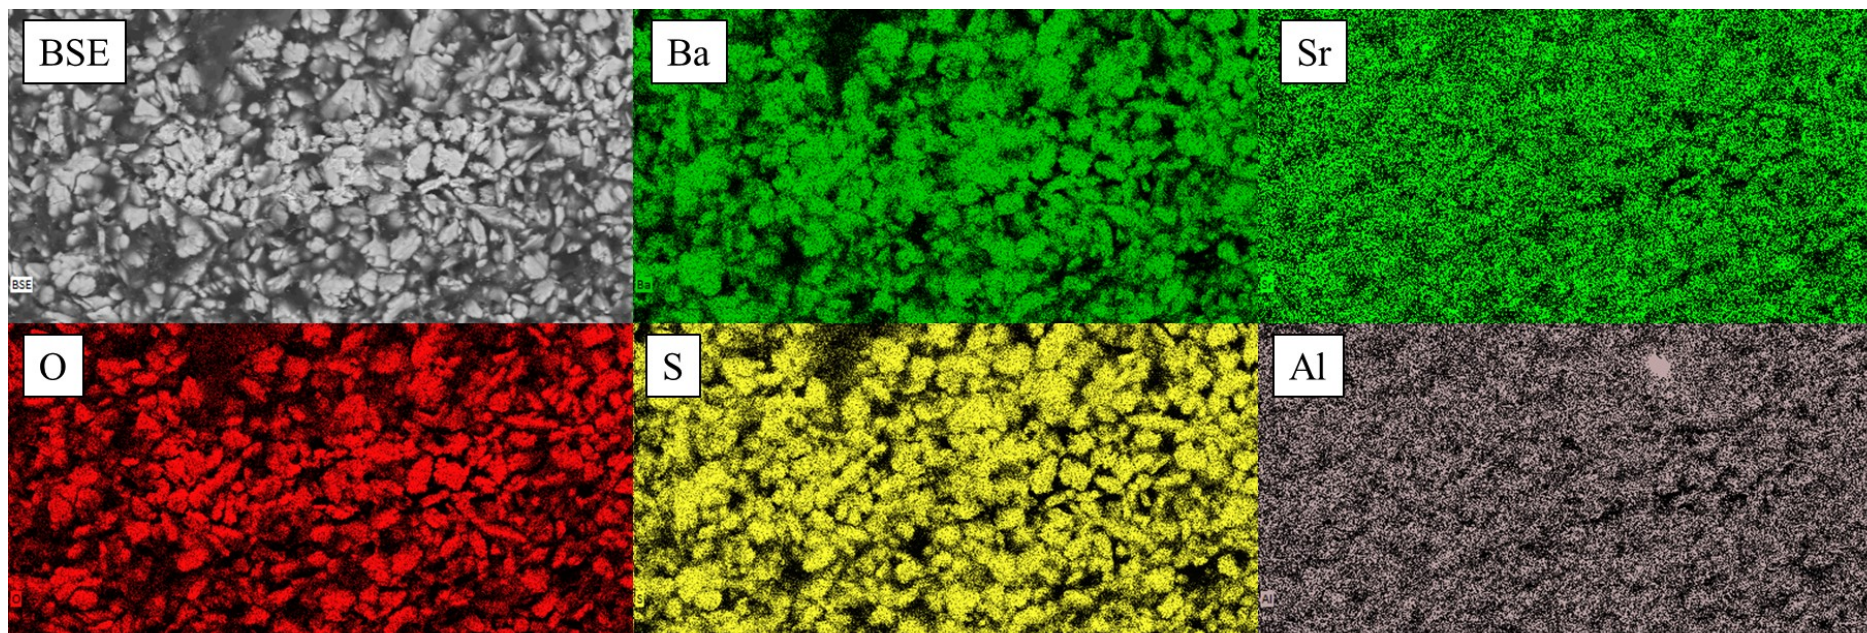

Reference material B - barite with  $9.65 \mu\text{g.g}^{-1}$

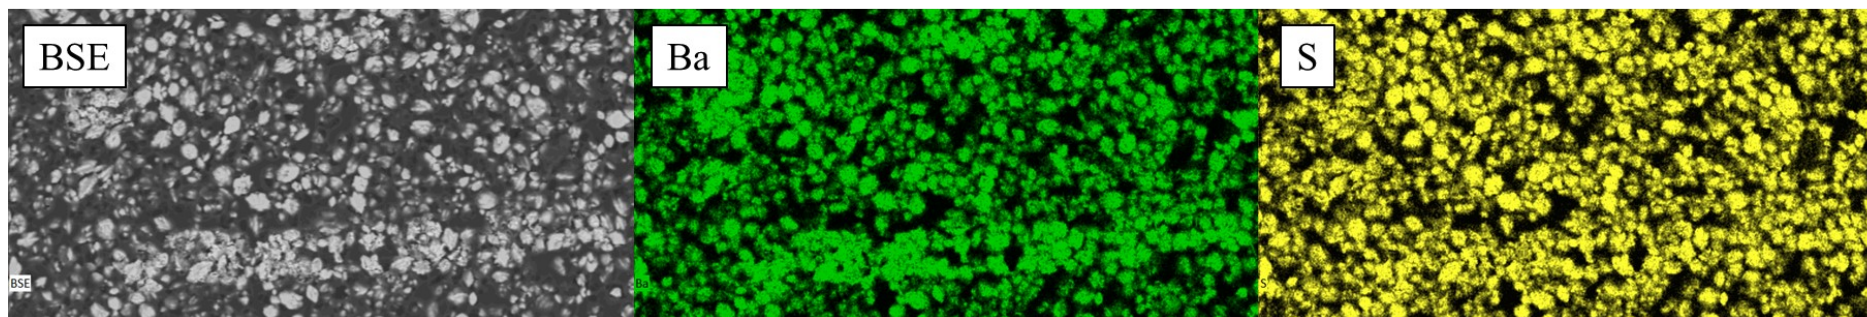

*Figure SI-3: SEM BSE and Ba, Sr, O, S and Al elemental images of reference material A with  $2.89 \mu\text{g.g}^{-1}$  of  $^{226}\text{Ra}$  and SEM BSE and Ba, and S elemental images of reference material B with  $9.65 \mu\text{g.g}^{-1}$ . In these areas, some of NanoSIMS images presented in the paper were acquired.*



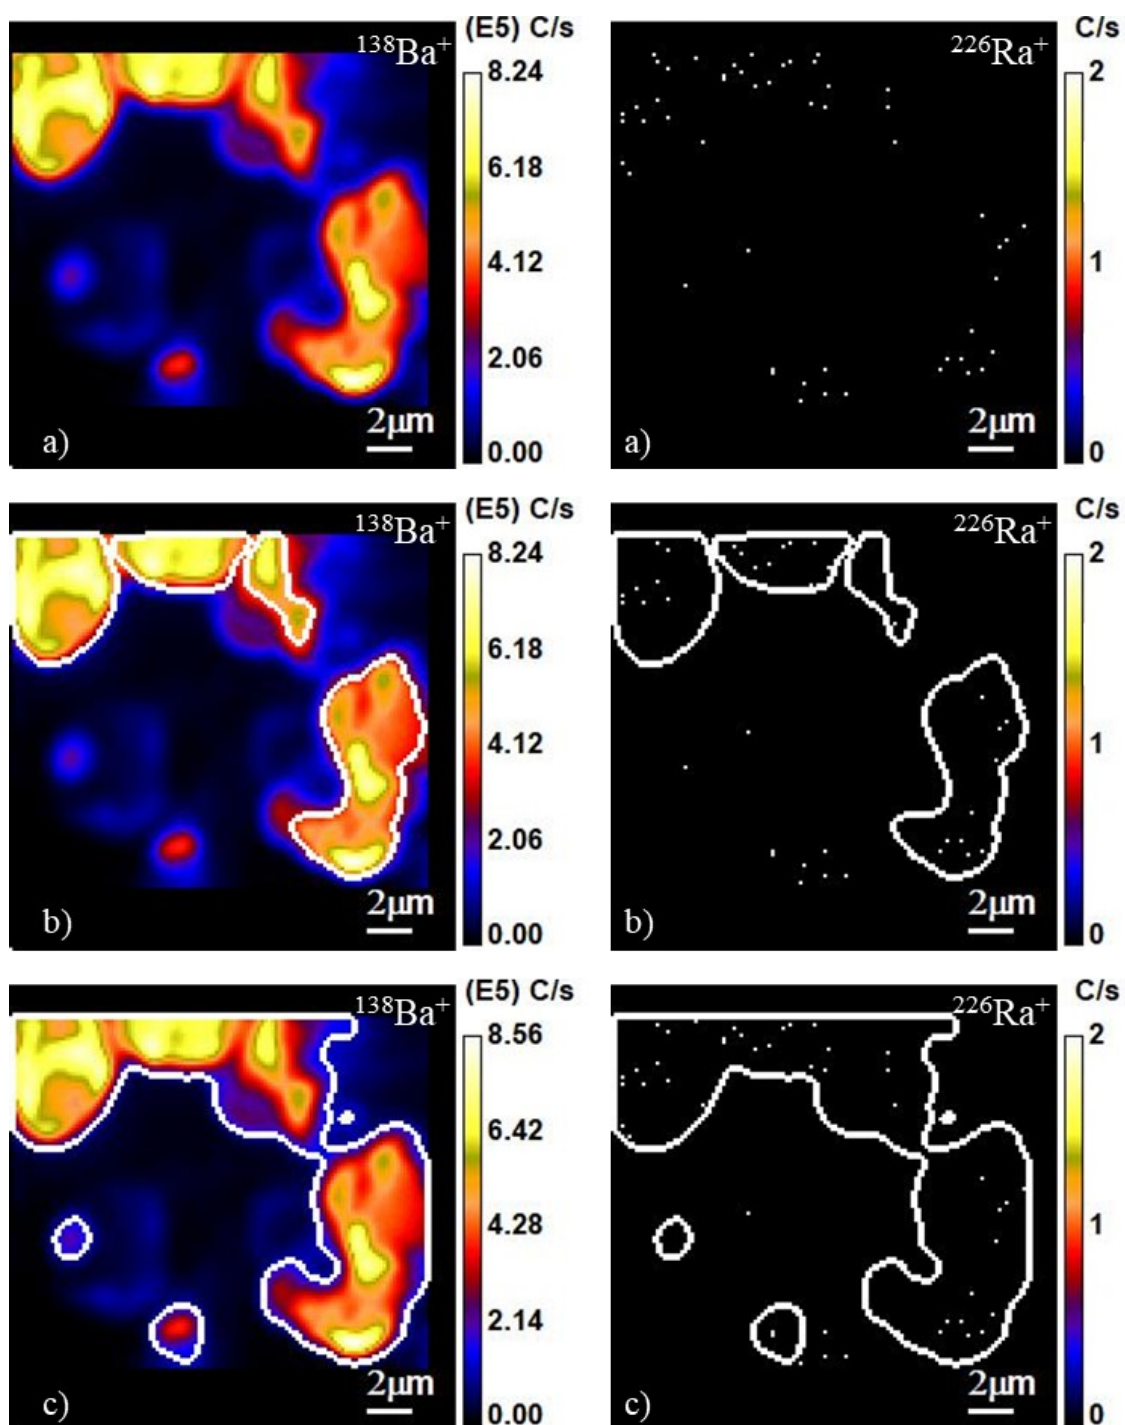

Figure SI-4: a) NanoSIMS images obtain of  $^{138}\text{Ba}$  and  $^{226}\text{Ra}$  for the blank (barite synthesized without addition of  $^{226}\text{Ra}$ ), in white line : b) "grain" ROI delimitation and c) "bulk" ROI delimitation.

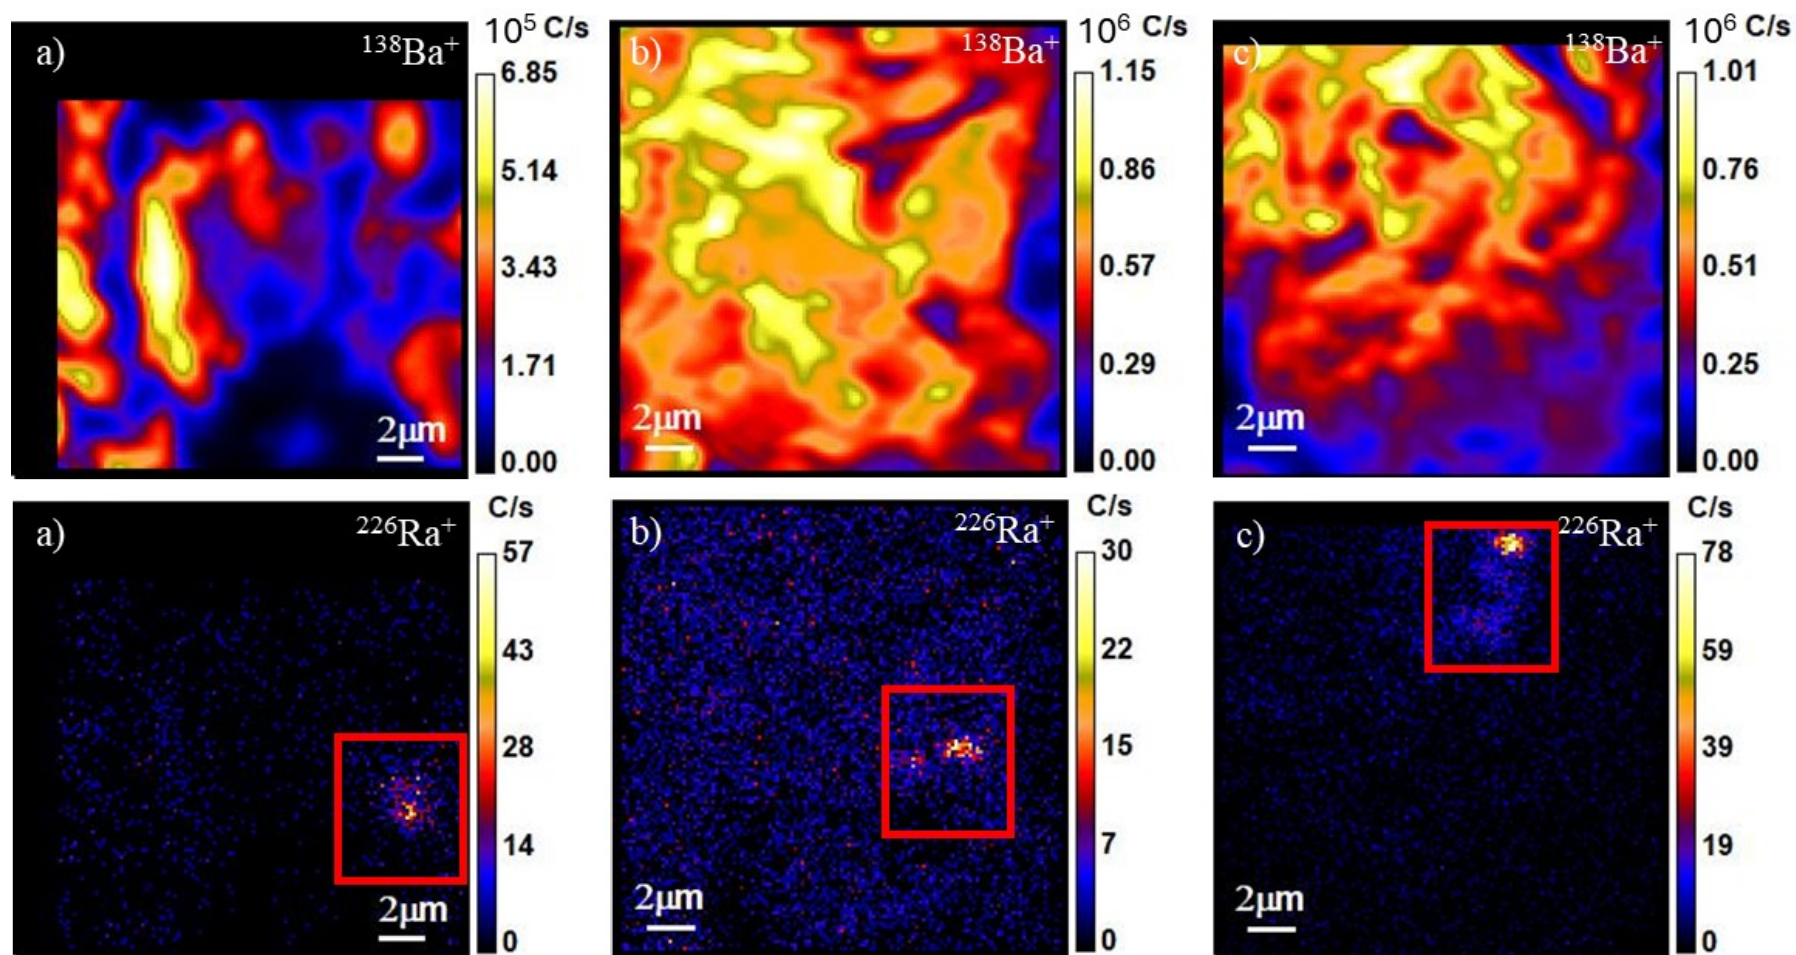

Figure SI-5: NanoSIMS image of the inhomogeneity observed for reference material A with  $2.89 \mu\text{g.g}^{-1}$  of  $^{226}\text{Ra}$ , with a) b) and c) three different area analyzed of the solid.



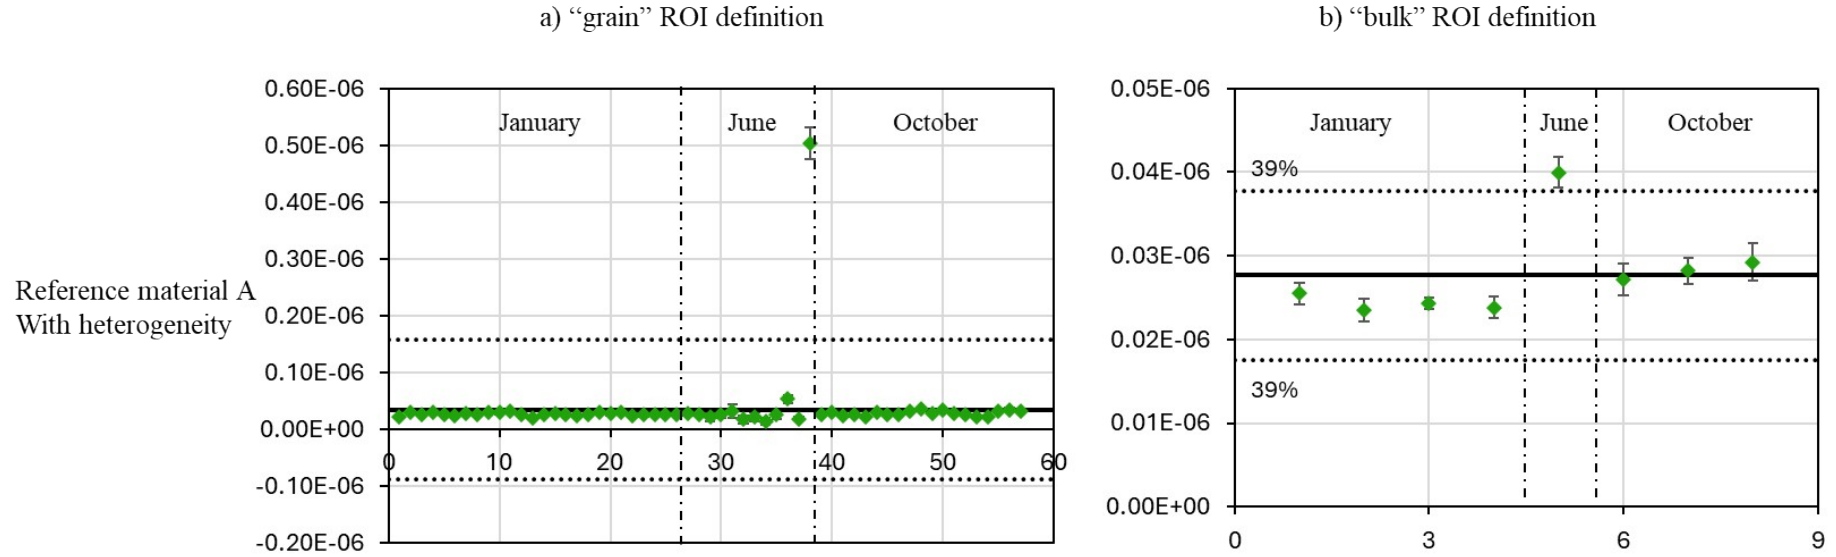

Figure SI 6:  $^{226}\text{Ra}^+ / ^{138}\text{Ba}^+$  ratio calculated for reference material A including the heterogeneity observed in Figure SI-3 with a) the grain ROI definition and b) the bulk ROI definition along the session of January, June and October of 2024. The black lines are the mean values while dotted lines present the relative reference material deviation (2 sd) in % associated

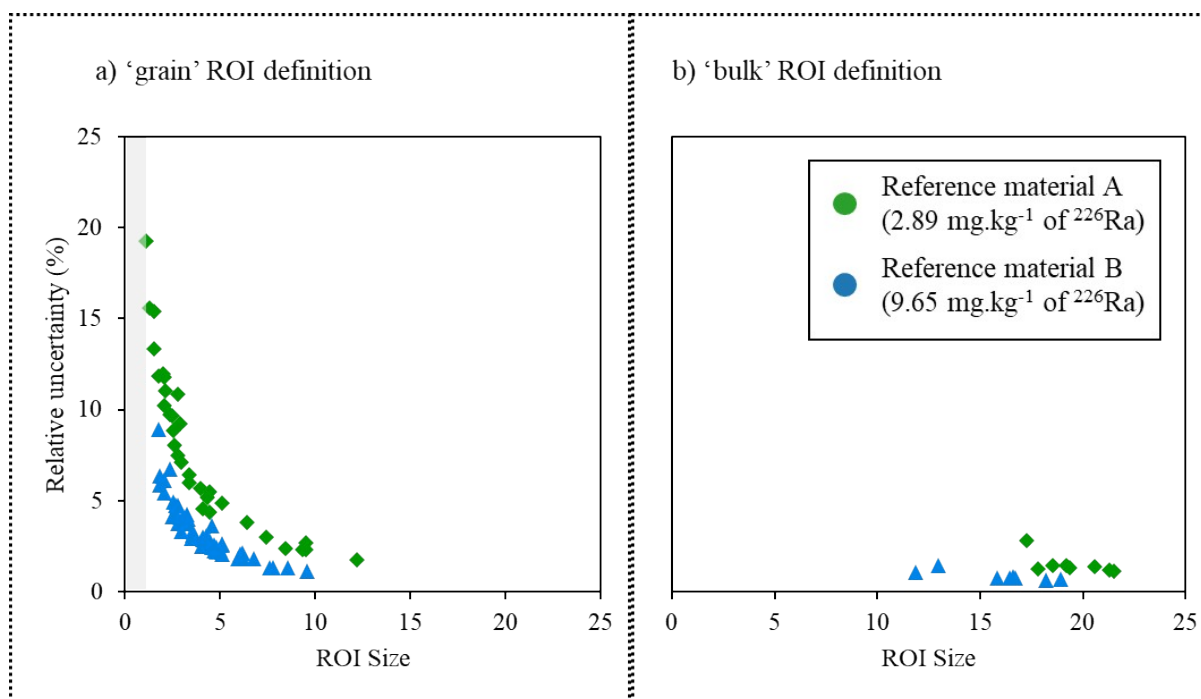

Figure SI-7: Relative uncertainty (%) associated to  $^{226}\text{Ra}^+ / ^{138}\text{Ba}^+$  ratio estimated using ROI selected (a) by “grain” method (Figure 3-(1), Figure SI-2-b), or (b) by “bulk” method (Figure 3-(2), Figure SI-2-c), depending on ROI size (in equivalent diameter -  $\mu\text{m}^2$ ) for the two reference materials A and B.

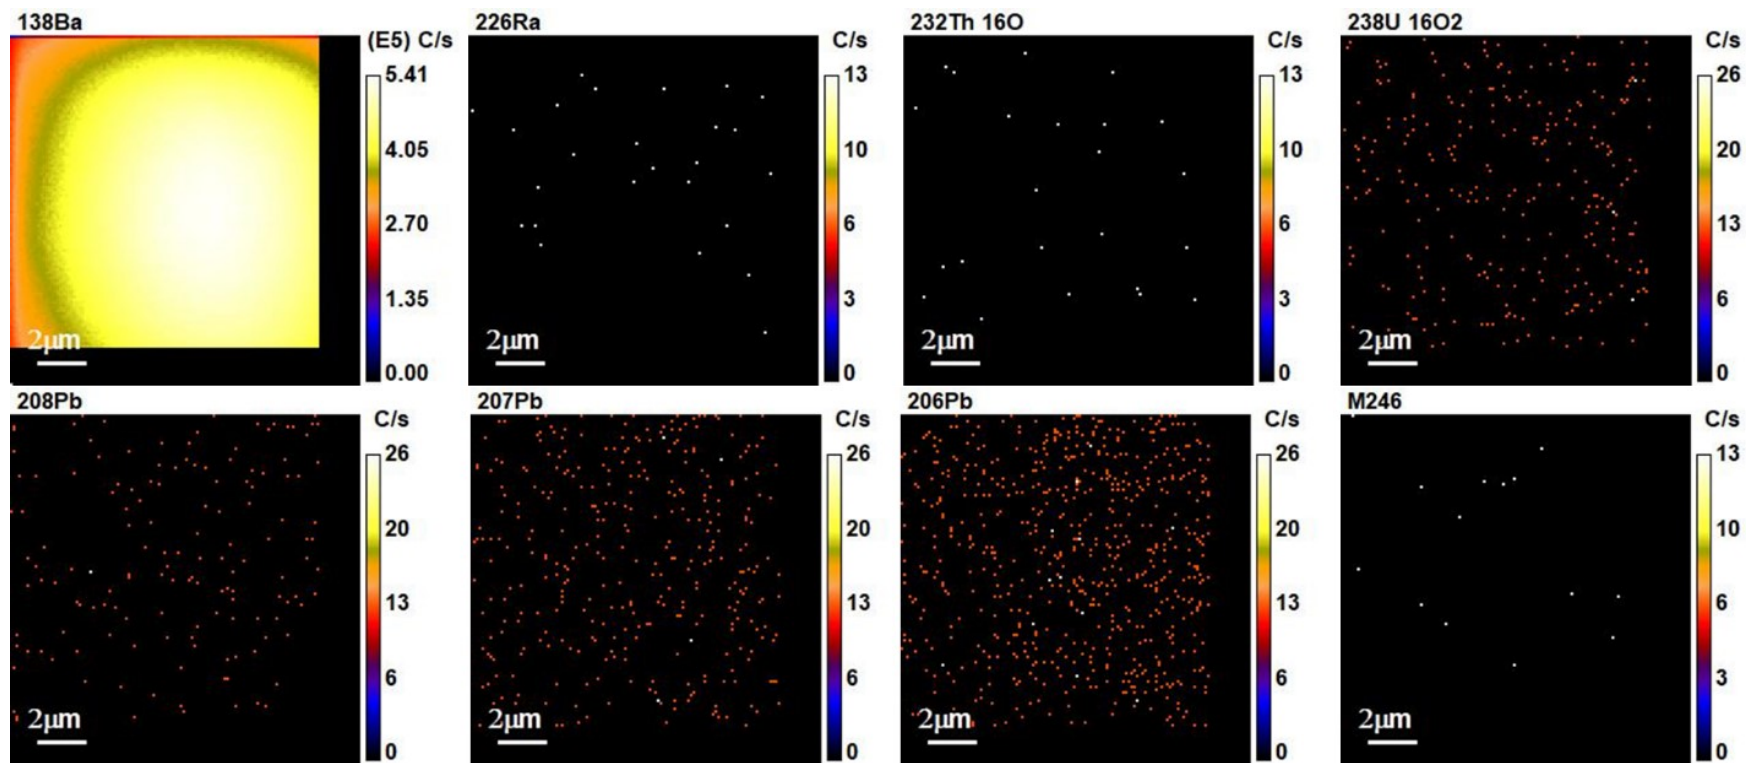

Figure SI-8: NanoSIMS images obtain of  $^{138}\text{Ba}$ ,  $^{226}\text{Ra}$ ,  $^{232}\text{Th}$ ,  $^{238}\text{U}$ ,  $^{208}\text{Pb}$ ,  $^{207}\text{Pb}$ ,  $^{206}\text{Pb}$ , and  $^{230}\text{Th}$  for the natural barite from Le Maine.
